# Supplementary material
Source: PubMed Central journal article supplement (PMC3093871)
Supplement: supp_M111.224857_jbc.M111.224857-1.pdf [file supp_M111.224857_jbc.M111.224857-1.pdf]

*Homo sapiens* 1 -----MAGVKAVALSFSGATGLTFLLMGCALLEDYGVYWPFLVLIFFHATSPIPHFIA---KRVTYD---SDAT- 62  
*Mus musculus* 1 -----MAGVKAVALSFSGATGLTFLLMGCALLEDYGVYWPFLVLIFFYVLSPIPYFIA---KRVTYD---SDAT- 62  
*Gallus gallus* 1 -----MAGIKALVGLSFSGATGLTFLLMGCALLEYGVYWPFLVLIFFYFCPIPHFIA---RRVSD---SDAA- 62  
*Xenopus laevis* 1 -----MAGIKALVALSFSGATGLTFLLMGCALLESYKVYWPFLVLIFFYFISPIPYFIA---TRISDD---TDA- 62  
*Tetraodon nigroviridis* 1 -----MAGIKALVGLSFSGATGLTFLLMGCALLEYGVYWPFLVLIFFYVLSPIPTFIS---RRLSDD---DSS- 61  
*Danio rerio* 1 -----MAGIKALVALSFSGATGLTFLLMGCALLESYGVYWPFLVLIFFYVLSPIPTLTA---RRHADD---TES- 61  
*Homo sapiens* 1 -----MAGIKALISL SFGGATGLMFLMGCALPIYNYWPLFVLIFFYILSPIPYCIA---RRLVDD---TDAM- 62  
*Mus musculus* 1 -----MAGIKALISL SFGGATGLMFLMGCALPIYNYWPLFVLIFFYILSPIPYCIA---RRLVDD---TDAM- 62  
*Gallus gallus* 1 -----MAGIKALISL SFGGATGLMFLMGCALPQYNYWPLFVLIFFYILSPIPYCIA---RRLVDD---TDAT- 62  
*Xenopus laevis* 1 -----MAGIKALISL SFGGATGLMFLMGCALPQYNYWPLFVLIFFYILSPIPYCIA---RRVDD---TDA- 62  
*Tetraodon nigroviridis* 1 -----MAGIKALISL SFGGATGLMFLMGCALPVYDKYWPLFVLIFFYILSPIPYCIS---RRVDD---TDSA- 62  
*Danio rerio* 1 -----MAGIKALISL SFGGATGLMFLMGCALPVYNYWPLFVLIFFYILCPLPHCIS---RRVDD---SDSA- 62  
*Caenorhabditis elegans* 1 -----MGGVRAAALAFAGVGLTFLLVLCALPRYGTWTPMVFITFYVLSVPVLLIA---RRFQED---MTG-- 61  
*Schistosoma japonicum* 1 -----MTGVKTVIFVSLAASISFTFLLCALPQYVWVWPLFMIFFYIAPVPLLA---KNCQN----- 57  
*Tribolium castaneum* 1 -----MAGIKTLVTLAFSTGLMFLMGCALPQYNYWPLFVLIFFYILSPIPTLTA---RRYTEH---QGS- 61  
*Rhodnius proxilus* 1 -----MPGKMAVSLAFAGSTGMTIILACALPHGVWVWPIVVIFFYIFAPVPTLA---RKYTER---TGS- 61  
*Anopheles gambiae* 1 -----MAESLKGVMLAMLSGMTMILACALPTNLWVPIFVLIFFYILCPFTLTA---KRIESD---DPA- 59  
*Drosophila melanogaster* 1 -----MATLKAIFICAFITCIGVTFLLACAVPTTKIFYPFFVLLFYVLSVLPVFA---RRTPG---NE- 60  
*Arabidopsis thaliana* 1 -----MGKLAFLAILVLSIVLQILACAL---FNNWVPLMSVIMYVLLPMLLFFG---GSDSTS---LFNES- 59  
*Oryza sativa* 1 MARSMTCLHSGRALLATLVSGLVQLILACAL---YNNWVPLMLYILPMLLFFL---RGSNPS---MMSND- 69  
*Arabidopsis thaliana* 1 -----MAMTIEVLAGLAFMFSSILLQILACAL---YGNWVPLMSALMYVVPMPCMFFG---GGSTQF---LISRD- 63  
*Oryza sativa* 1 -----MAMTIEVLAGLAFMFSTILLQILACAL---YNNWVPLMALMYVLPMPCLFFG---GGSTQF---LTSRD- 63  
*Dictyostelium discoideum* 1 -----MG---HDKGFSCAFVGLLNFILACTIVS---HSGYPIIVVASYFLAPFPNLC---RNRDS---FSSE- 57  
*Leishmania major* 1 -----MSSLRQLIISAFLLVGFLLILGCTVVKRRAVPLMSLAFYCFAPVFFLFCG---RGADSDDFNDFDEP 68  
*Schizosaccharomyces pombe* 1 -----MSDLRKLIGLSSVLAIVGFMLVILSCAL---FKWVYPLLVIPFLLAPLPNLT---KKYSTSHDFLQEE- 63  
*Saccharomyces cerevisiae* 1 --MMEFKVSPITKISLSGFLAGFLLVILSCAL---FHNYPLFDLILFLLAPIPNTIFNAGNKYHTS---DFMDS- 74  
*Neurospora crassa* 1 -----MAAGLKTIALSFVLAIVGFLLVILSCAL---WKAYYPLLVVATYVLAIPINWIC---SHCANPDDFVESS- 68  
*Magnaporthe grisea* 1 -----MPNAGLKTIALSFVLAIVGFLLVILSCAL---WKVYVPLLVVATYVLAIPVNWIA---RSCSNPDDFVESS- 69

*Homo sapiens* 63 SSACRELAYFFTTGIVVSAGFPVILARVA---VIKWGACGLVLAGNAVIFLTIQGFLLVFGGDDFSWEQW-- 131  
*Mus musculus* 63 SSACRELAYFFTTGIVVSAGFPVILARVD---VIKWGACGLVLAGNAVIFLTIQGFLLVFGGDDFSWEQW-- 131  
*Gallus gallus* 63 SSACRELAYFFTTGIVVSAGFPVILARVE---AIKWGACGLVLAGNAVIFLTIQGFLLVFGGDDFSWEQW-- 131  
*Xenopus laevis* 63 SSACRELAYFFTTGIVVSAGFPVILARIG---VILWGACGLVLAGNAVIFLTIQGFLLVFGGDDFSWEQW-- 131  
*Tetraodon nigroviridis* 62 SNACRELAYFLTTGIVVSAGFPVILARKE---TIQWGACGLVMTGNVIFLTIQGFLLVFGGDDFSWEQW-- 130  
*Danio rerio* 62 SNACRELAYFLTTGIVVSAGFPVILARKE---VIQWGAAGLVMAAGNCFVFLTIQGFLLVFGGDDFSWEQW-- 130  
*Homo sapiens* 63 SNACKELAIFFLTGIVVSAGFPVIFARAH---LIEWGACALVLTGNTVIFATILGFFLVFGSNDDFSQQW-- 131  
*Mus musculus* 63 SNACKELAIFFLTGIVVSAGFPVIFARAH---LIEWGACALVLTGNTVIFATILGFFLVFGSNDDFSQQW-- 131  
*Gallus gallus* 63 SNACKELAIFFLTGIVVSAGFPVIFARAE---LIYWGACALVLTGNTVIFATILGFFLVFGSNDDFSQQW-- 131  
*Xenopus laevis* 63 SNACKELAIFFLTGIVVSAGFPVIFARIQ---MIEWEACALVLTGNMVFSTILGFFLVFGSNDDFSQQW-- 131  
*Tetraodon nigroviridis* 63 SNACKELAIFFLTGIVVSAGFPVIFARAA---VIAWGACALVLTGNVIFATILGFFLVFGSNDDFSQQW-- 131  
*Danio rerio* 63 SNACKELAIFFLTGIVVSAGFPVIFARAA---VIAWGACALVLTGNVIFATILGFFLVFGSNDDFSQQW-- 131  
*Caenorhabditis elegans* 62 TNACLELALFITTGIVISAFALPVLARAG---TIANSAFCFLVNTGSVIMFGTIIAYFYLRHDDSGSWSQSLF 132  
*Schistosoma japonicum* 58 SSSSEDLVFLTTTIVTSAYALPILFARAPKNPLIFWGACGLT SANTLMFATIFFLVYLVVKKPDDFGIGF--- 129  
*Tribolium castaneum* 62 SNCLETAIFLTMGLIVSFAFALPVLARAV---IQWGACYLTLAGNVVIFATILGFFLVFGGDDDFSQQW-- 129  
*Rhodnius proxilus* 62 TNSTMELAIFFITMAFVVSFALPVLARAPVTKPAIEWGACYLTLTGNIVVYITVIGFFVTLYQDDSD-YNMW-- 133  
*Anopheles gambiae* 60 R---AASAMFATIGIVMSFALPVLARAEV---IQWGACLLTLAGNVGAYATILAYYFGFESGDS---NMW-- 125  
*Drosophila melanogaster* 61 TNPKSFAHFLTAGMVL SAFALPVLARAL---VITWTASILTISNIINYGTFWYAMRDDEPYG---SMF-- 126  
*Arabidopsis thaliana* 60 DNSWINAAKFLTGASAVGSVAIPSLKAG---LIGWGALALDSSYVFLVAIILGYICIGDASNYYSYI--- 127  
*Oryza sativa* 70 GDTWYNFTKFLTGASIVGSIAIPSLKAG---VIGWALTMLSSFLVFGVATILGFFLVFGSNDDFSQQW-- 136  
*Arabidopsis thaliana* 64 GGGWIDAAKFLTGASTVGSIAIPILRAQ---MIETGAMLI EFTSFFIFICTVMCFHRA-SLDDDW----- 126  
*Oryza sativa* 64 GGGWFNAKFLTGASAMGSIAIPILRAQ---LIETGAMLI EFTSFFILVCTVMCFHRA-TLDDDW----- 126  
*Dictyostelium discoideum* 58 KGTFFDIGLFLITGFAIPMILASD---IISGKALAFSAGGVTYATILTLVWFFNRHNDED-NNW-- 125  
*Leishmania major* 69 LDAFSTVGLFMGGVLLISGIAIPVLYLTS---VICGLALFFTLSGVCFITAGVSLTVADRGNDDAADGYNF 139  
*Schizosaccharomyces pombe* 64 DRNLLDFGRFTFGATICTGFALPVLVNVG---LIGTAAATMSCVGGSIIFLVITLTSYQAFVQHEEF----- 128  
*Saccharomyces cerevisiae* 75 SNTGQDLAHLFLTGMVLTSGIALPVVYFCQ---LIGHLSCIMVIGGLIYSSVIFKWFKFKDFNEDDSLFG- 140  
*Neurospora crassa* 69 GAAVLDLGRFCTGFLVMMGLALPVVLANSA---IITVPAMIMSVIGGLIYGTIISFAMFFQEEQDF----- 128  
*Magnaporthe grisea* 70 GGAALDLGRFCTGFLVVMGIALPVLARAH---MINAGALVMSVAGGLIYGTIISFGMFFTEEQEF----- 129

**Supplementary figure S1. Sequence alignment of endospasin homologues of indicated species.** Protein sequences were aligned using Clustal W. Conserved and similar residues are highlighted in black and grey, respectively.

The following sequences entries were retrieved from GenBank : *Homo sapiens* [gi:2266638; gi:49456429], *Mus musculus* [gi:28077089; gi:13386094], *Gallus gallus* [gi:56118974; gi:50746625], *Xenopus laevis* [gi:148235606; gi:27696439], *Tetraodon nigroviridis* [gi:47227970; gi:47227550], *Danio rerio* [gi:62531199; gi:50417924], *Caenorhabditis elegans* [gi:68067822], *Schistosoma japonicum* [gi:29840914], *Tribolium castaneum* [gi:189238958], *Rhodnius proxilus* [gi:33518717], *Anopheles gambiae* [gi:157016714], *Drosophila melanogaster* [gi:25012840], *Arabidopsis thaliana* [gi:17978901; gi:20466135], *Oryza sativa* [gi:125541513; gi:149392827], *Dictyostelium discoideum* [gi:74855942], *Leishmania major* [gi:68127014], *Schizosaccharomyces pombe* [gi:5734472], *Saccharomyces cerevisiae* [gi:1352881], *Neurospora crassa* [gi:28922424], *Magnaporthe grisea* [gi:39944086].
